# Supplementary material for: Revisiting the coding potential of the E. coli genome through Hfq co-immunoprecipitation
Source: PubMed Central journal article supplement — RNA Biol. 2014 Jun 12;11(5):641–54. doi: 10.4161/rna.29299 (PMC4152368; doi:10.4161/rna.29299), 2014-06-12
Supplement: rna-11-641-s01.pdf [file rna-11-641-s01.pdf]

## Supplemental Material to:

Ivana Bilusic, Niko Popitsch, Philipp Rescheneder, Renée Schroeder, Meghan Lybecker

Revisiting the coding potential of the E. coli genome through Hfq co-immunoprecipitation

2012; 11(5)

<http://dx.doi.org/10.4161/rna.29299>

[www.landesbioscience.com/journals/rnabiology/article/29299/](http://www.landesbioscience.com/journals/rnabiology/article/29299/)

### Additional Files:

[www.landesbioscience.com/journals/rnabiology/article/29299/2014RNABIOL0069R\\_TableS1.xlsx](http://www.landesbioscience.com/journals/rnabiology/article/29299/2014RNABIOL0069R_TableS1.xlsx)  
[www.landesbioscience.com/journals/rnabiology/article/29299/2014RNABIOL0069R\\_TableS2.xlsx](http://www.landesbioscience.com/journals/rnabiology/article/29299/2014RNABIOL0069R_TableS2.xlsx)  
[www.landesbioscience.com/journals/rnabiology/article/29299/2014RNABIOL0069R\\_TableS3.xlsx](http://www.landesbioscience.com/journals/rnabiology/article/29299/2014RNABIOL0069R_TableS3.xlsx)  
[www.landesbioscience.com/journals/rnabiology/article/29299/2014RNABIOL0069R\\_TableS4.xlsx](http://www.landesbioscience.com/journals/rnabiology/article/29299/2014RNABIOL0069R_TableS4.xlsx)  
[www.landesbioscience.com/journals/rnabiology/article/29299/2014RNABIOL0069R\\_TableS5.xlsx](http://www.landesbioscience.com/journals/rnabiology/article/29299/2014RNABIOL0069R_TableS5.xlsx)  
[www.landesbioscience.com/journals/rnabiology/article/29299/2014RNABIOL0069R\\_TableS6.xlsx](http://www.landesbioscience.com/journals/rnabiology/article/29299/2014RNABIOL0069R_TableS6.xlsx)  
[www.landesbioscience.com/journals/rnabiology/article/29299/2014RNABIOL0069R\\_TableS7.xlsx](http://www.landesbioscience.com/journals/rnabiology/article/29299/2014RNABIOL0069R_TableS7.xlsx)  
[www.landesbioscience.com/journals/rnabiology/article/29299/2014RNABIOL0069R\\_TableS8.xlsx](http://www.landesbioscience.com/journals/rnabiology/article/29299/2014RNABIOL0069R_TableS8.xlsx)  
[www.landesbioscience.com/journals/rnabiology/article/29299/2014RNABIOL0069R\\_TableS9.xlsx](http://www.landesbioscience.com/journals/rnabiology/article/29299/2014RNABIOL0069R_TableS9.xlsx)  
[www.landesbioscience.com/journals/rnabiology/article/29299/2014RNABIOL0069R\\_TableS10.xlsx](http://www.landesbioscience.com/journals/rnabiology/article/29299/2014RNABIOL0069R_TableS10.xlsx)  
[www.landesbioscience.com/journals/rnabiology/article/29299/2014RNABIOL0069R\\_TableS11.xlsx](http://www.landesbioscience.com/journals/rnabiology/article/29299/2014RNABIOL0069R_TableS11.xlsx)  
[www.landesbioscience.com/journals/rnabiology/article/29299/2014RNABIOL0069R\\_TableS12.xlsx](http://www.landesbioscience.com/journals/rnabiology/article/29299/2014RNABIOL0069R_TableS12.xlsx)  
[www.landesbioscience.com/journals/rnabiology/article/29299/2014RNABIOL0069R\\_Dataset.xlsx](http://www.landesbioscience.com/journals/rnabiology/article/29299/2014RNABIOL0069R_Dataset.xlsx)

A

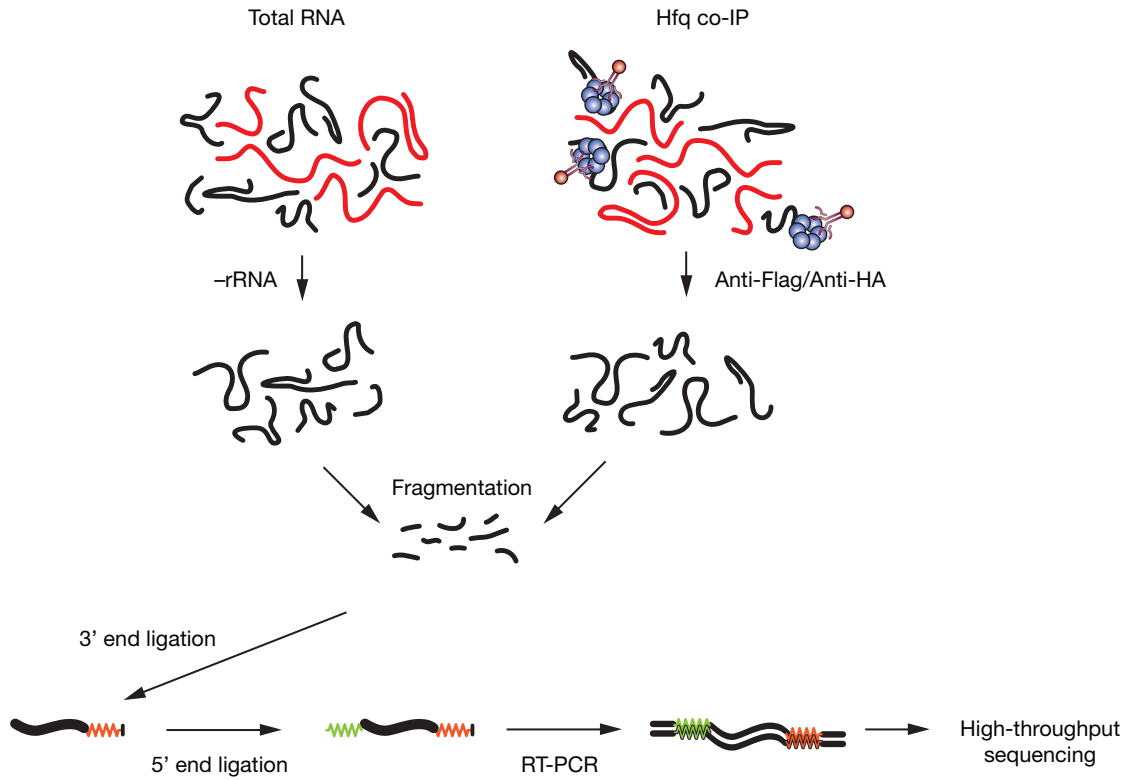

B

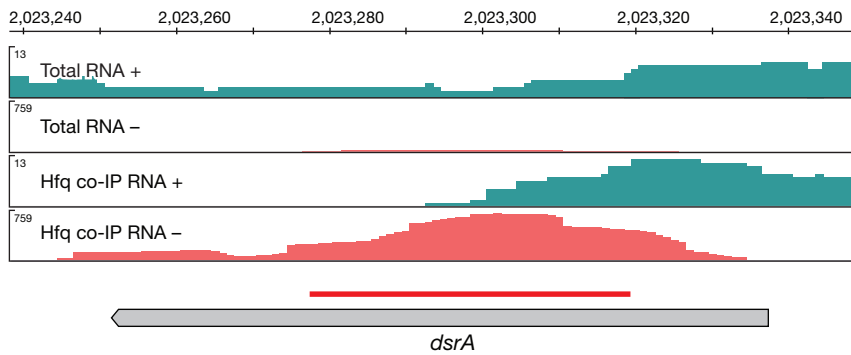

C

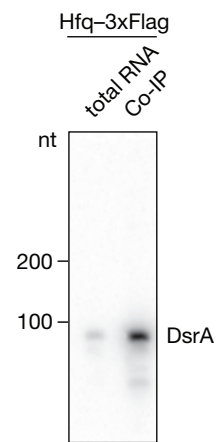

D

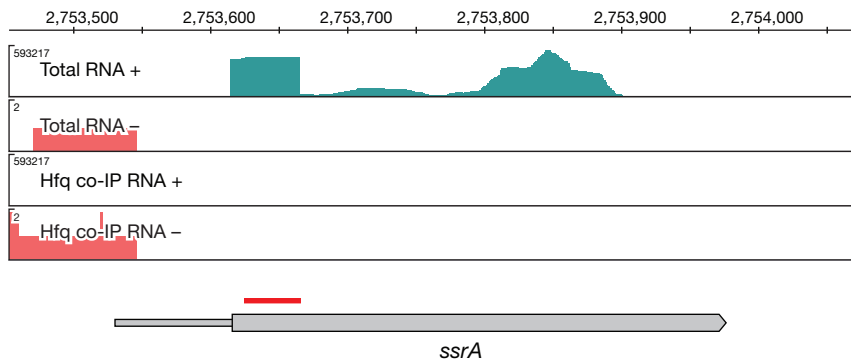

E

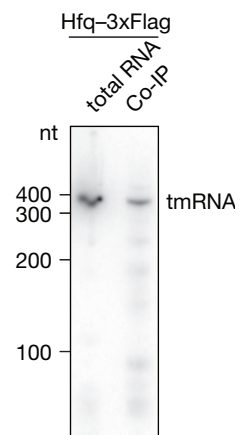

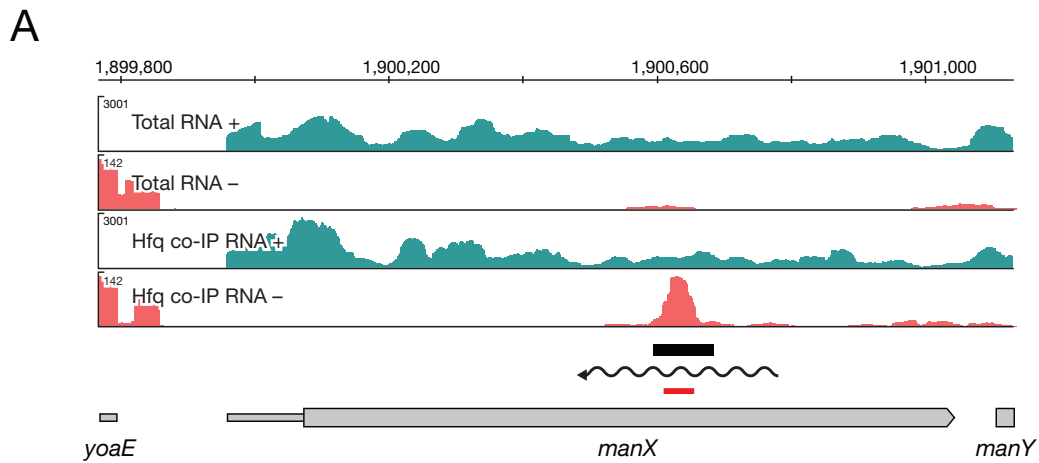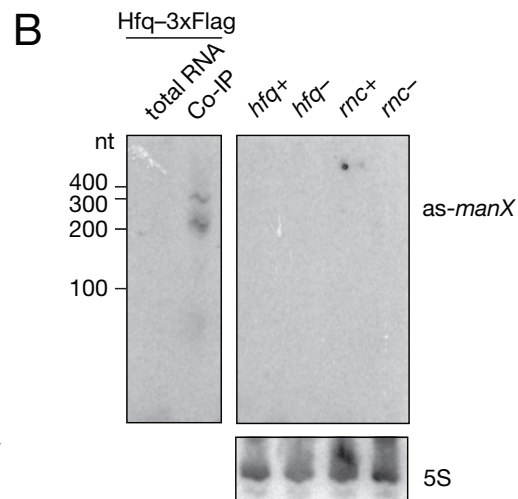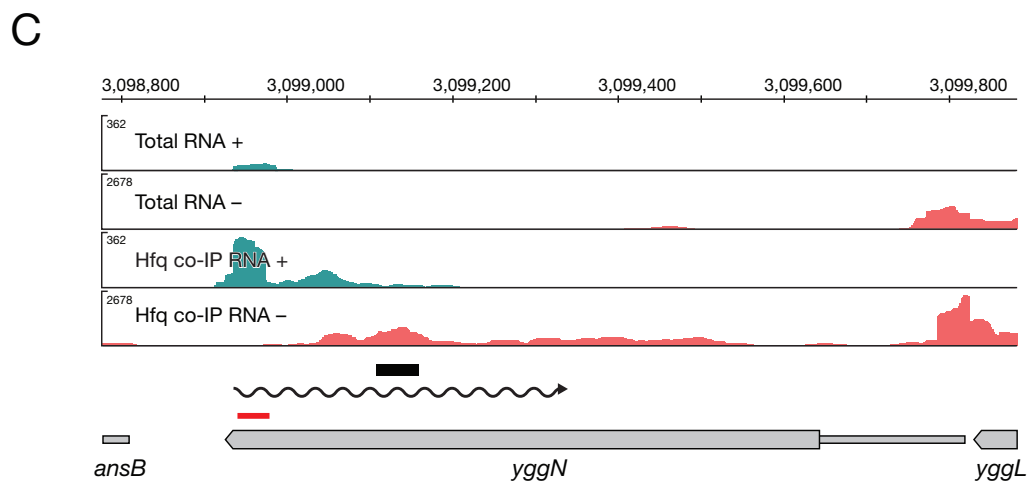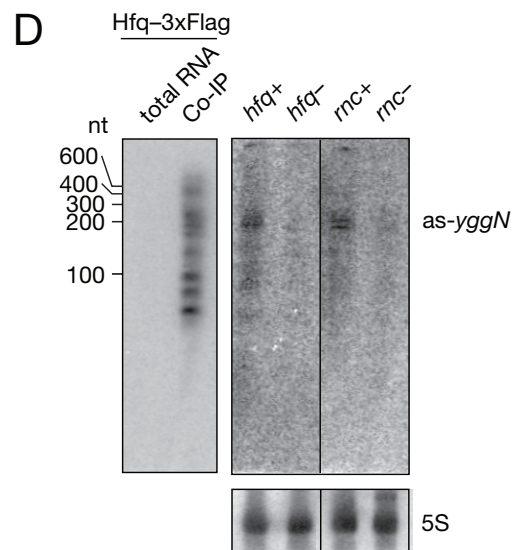

A

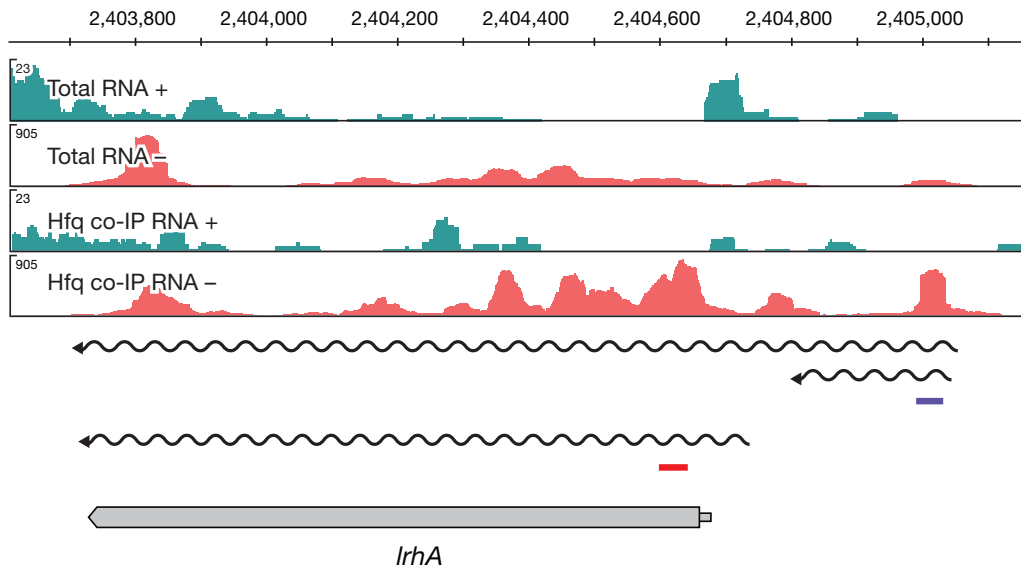

B

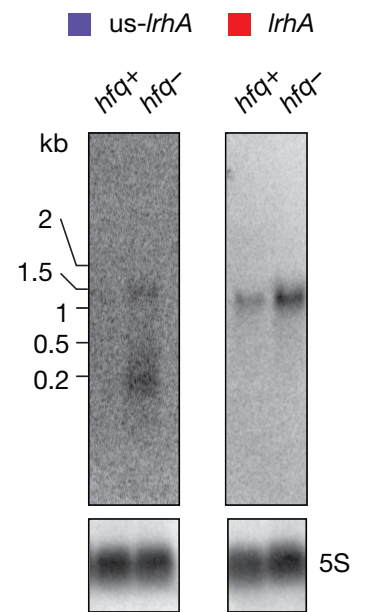

**Figure S1. Library preparation and validation of results.**

(A) Cells with C-terminally tagged Hfq bearing either 3xFlag or HA were grown to exponential phase. Total RNA depleted of rRNA or RNA co-immunoprecipitated with Hfq were fragmented, size-selected and subjected to subsequent RNA ligation. RNA was converted into cDNA, amplified and subjected to high-throughput sequencing. Deep-sequencing results for DsrA and tmRNA (B and D) represented as averaged coverage maps of 3xFlag- and HA total RNAs and 3xFlag- and HA-Hfq co-immunoprecipitated RNAs (Hfq Co-IP). Genomic strands are shown in blue (+) and red (-). Note that scales for + and - strand differ. Genomic location is depicted on top. The red bar indicates position of the oligonucleotide probe. Northern blot analyses of DsrA and tmRNA (C and E). Total RNA and RNA co-immunoprecipitated with 3xFlag were fractionated on a denaturing 8% polyacrylamide gel, electro-blotted onto a nylon membrane and hybridized with radioactively labeled oligonucleotide. Note different amounts of RNA were loaded; DsrA 10  $\mu$ g total RNA and 1.5  $\mu$ g Co-IP RNA; tmRNA 3  $\mu$ g total RNA and 3  $\mu$ g Co-IP RNA. 5S RNA was used as a loading control.

**Figure S2. Antisense RNAs containing Hfq aptamers bind Hfq.**

Deep sequencing and Northern blot analyses of *as-manX* and *as-yggN* as described in Figure 3A and 3B. The black bar indicates the position of the Hfq aptamer reported by Lorenz et al.<sup>9</sup>

**Figure S3. Hfq destabilizes *lrhA*.**

(A) Deep sequencing of *lrhA* region as described in Figure 3A. (B) Northern blot analyses of *ig-lrhA-alaA* and *lrhA*. 10  $\mu$ g of total RNA isolated from *hfq*-deletion (*hfq*-) and corresponding isogenic wild-type (*hfq*+) cells were fractionated on a denaturing 1% formaldehyde-agarose gel, blotted onto a nylon membrane and hybridized with radioactively labeled oligonucleotide. Violet and red bars indicate the positions of the oligonucleotide probes used in the corresponding Northern blots. Ladder sizes in kb are indicated. 5S RNA was used as a loading control.

## Supplemental references:

49. Jørgensen MG, Nielsen JS, Boysen A, Franch T, Møller-Jensen J, Valentin-Hansen P. Small regulatory RNAs control the multi-cellular adhesive lifestyle of *Escherichia coli*. *Mol Microbiol* 2012; 84:36–50.
50. Thomason MK, Fontaine F, De Lay N, Storz G. A small RNA that regulates motility and biofilm formation in response to changes in nutrient availability in *Escherichia coli*. *Mol Microbiol* 2012; 84:17–35.
51. Boysen A, Møller-Jensen J, Kallipolitis B, Valentin-Hansen P, Overgaard M. Translational regulation of gene expression by an anaerobically induced small non-coding RNA in *Escherichia coli*. *J Biol Chem* 2010; 285:10690–702.
52. Sledjeski DD, Whitman C, Zhang A. Hfq Is Necessary for Regulation by the Untranslated RNA DsrA. *J Bacteriol* 2001; 183:1997-2005.
53. Zhang A, Altuvia S, Tiwari A, Argaman L, Hengge-Aronis R, Storz G. The OxyS regulatory RNA represses rpoS translation and binds the Hfq (HF-I) protein. *EMBO J* 1998; 17:6061–8.
54. Chen S, Zhang A, Blyn LB, Storz G. MicC , a Second Small-RNA Regulator of Omp Protein Expression in *Escherichia coli*. *J Bacteriol* 2004; 186: 6689-97.
55. Douchin V, Bohn C, Boulloc P. Down-regulation of porins by a small RNA bypasses the essentiality of the regulated intramembrane proteolysis protease RseP in *Escherichia coli*. *J Biol Chem* 2006; 281:12253–9.
56. Baba T, Ara T, Hasegawa M, Takai Y, Okumura Y, Baba M, Datsenko K a, Tomita M, Wanner BL, Mori H. Construction of *Escherichia coli* K-12 in-frame, single-gene knockout mutants: the Keio collection. *Mol Syst Biol* 2006; 2:2006.0008.
57. Dasgupta S, Fernandez L, Kameyama L, Inada T, Nakamura Y, Pappas a, Court DL. Genetic uncoupling of the dsRNA-binding and RNA cleavage activities of the *Escherichia coli* endoribonuclease RNase III--the effect of dsRNA binding on gene expression. *Mol Microbiol* 1998; 28:629–40.
